# Supplementary material
Source: publisher site journal article supplement (https://www.dovepress.com/get_supplementary_file.php?f=353848.docx)
Supplement: Supplementary file 1 [file get_supplementary_file.php]

**Description of supplementary figure legends**


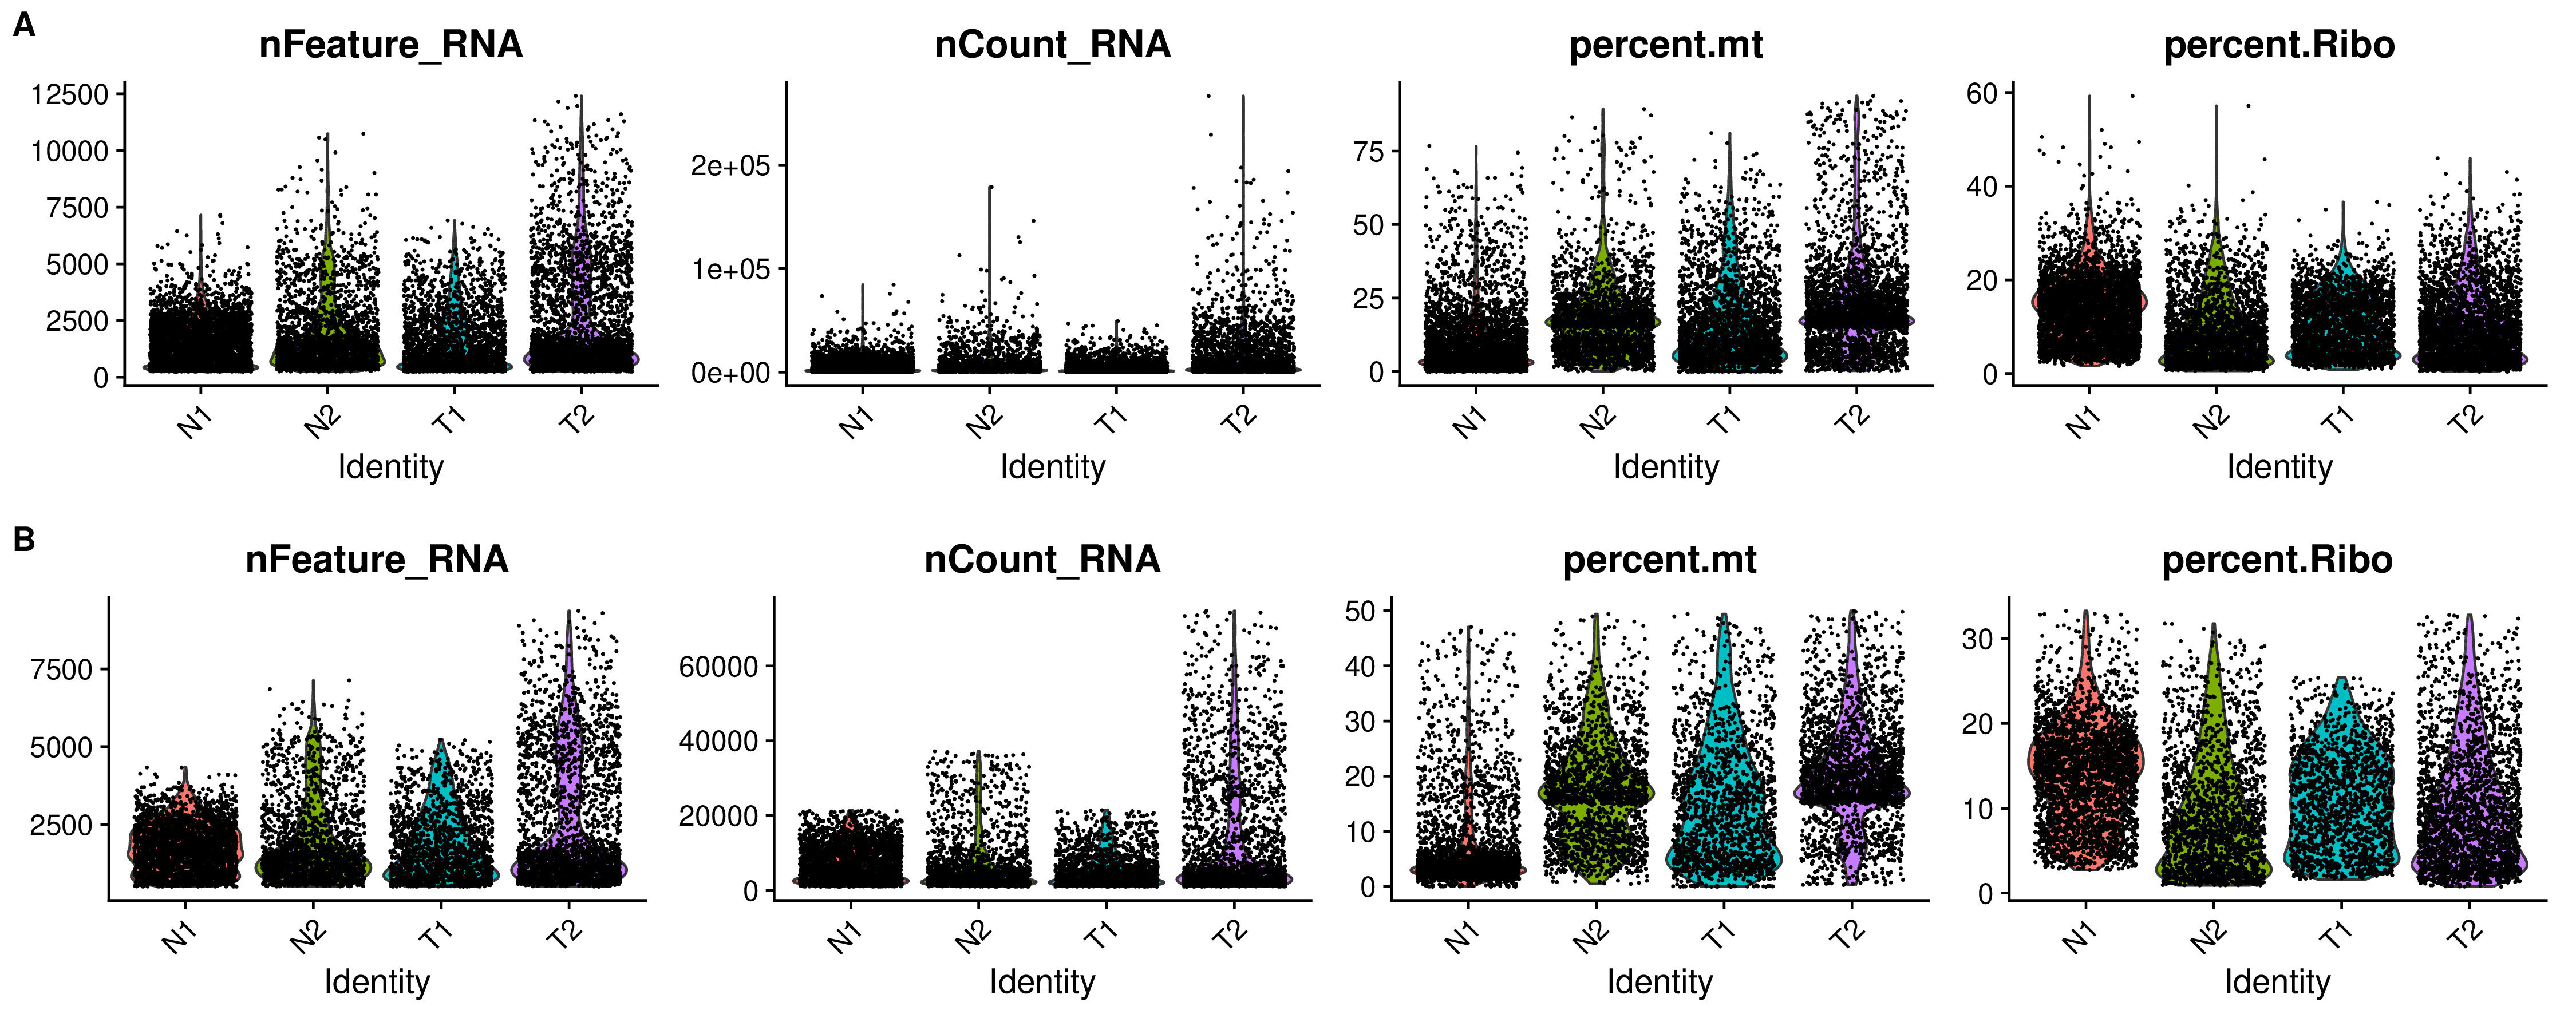


**Supplementary Figure S1. Quality control of scRNA-seq data for tumor and para cancerous tissues.** A: Number of RNAs and percentages of mitochondrial genes in each cell before quality control. B: Number of RNAs and percentages of mitochondrial genes in each cell after filtration for quality. scRNA-seq, single-cell RNA sequencing.


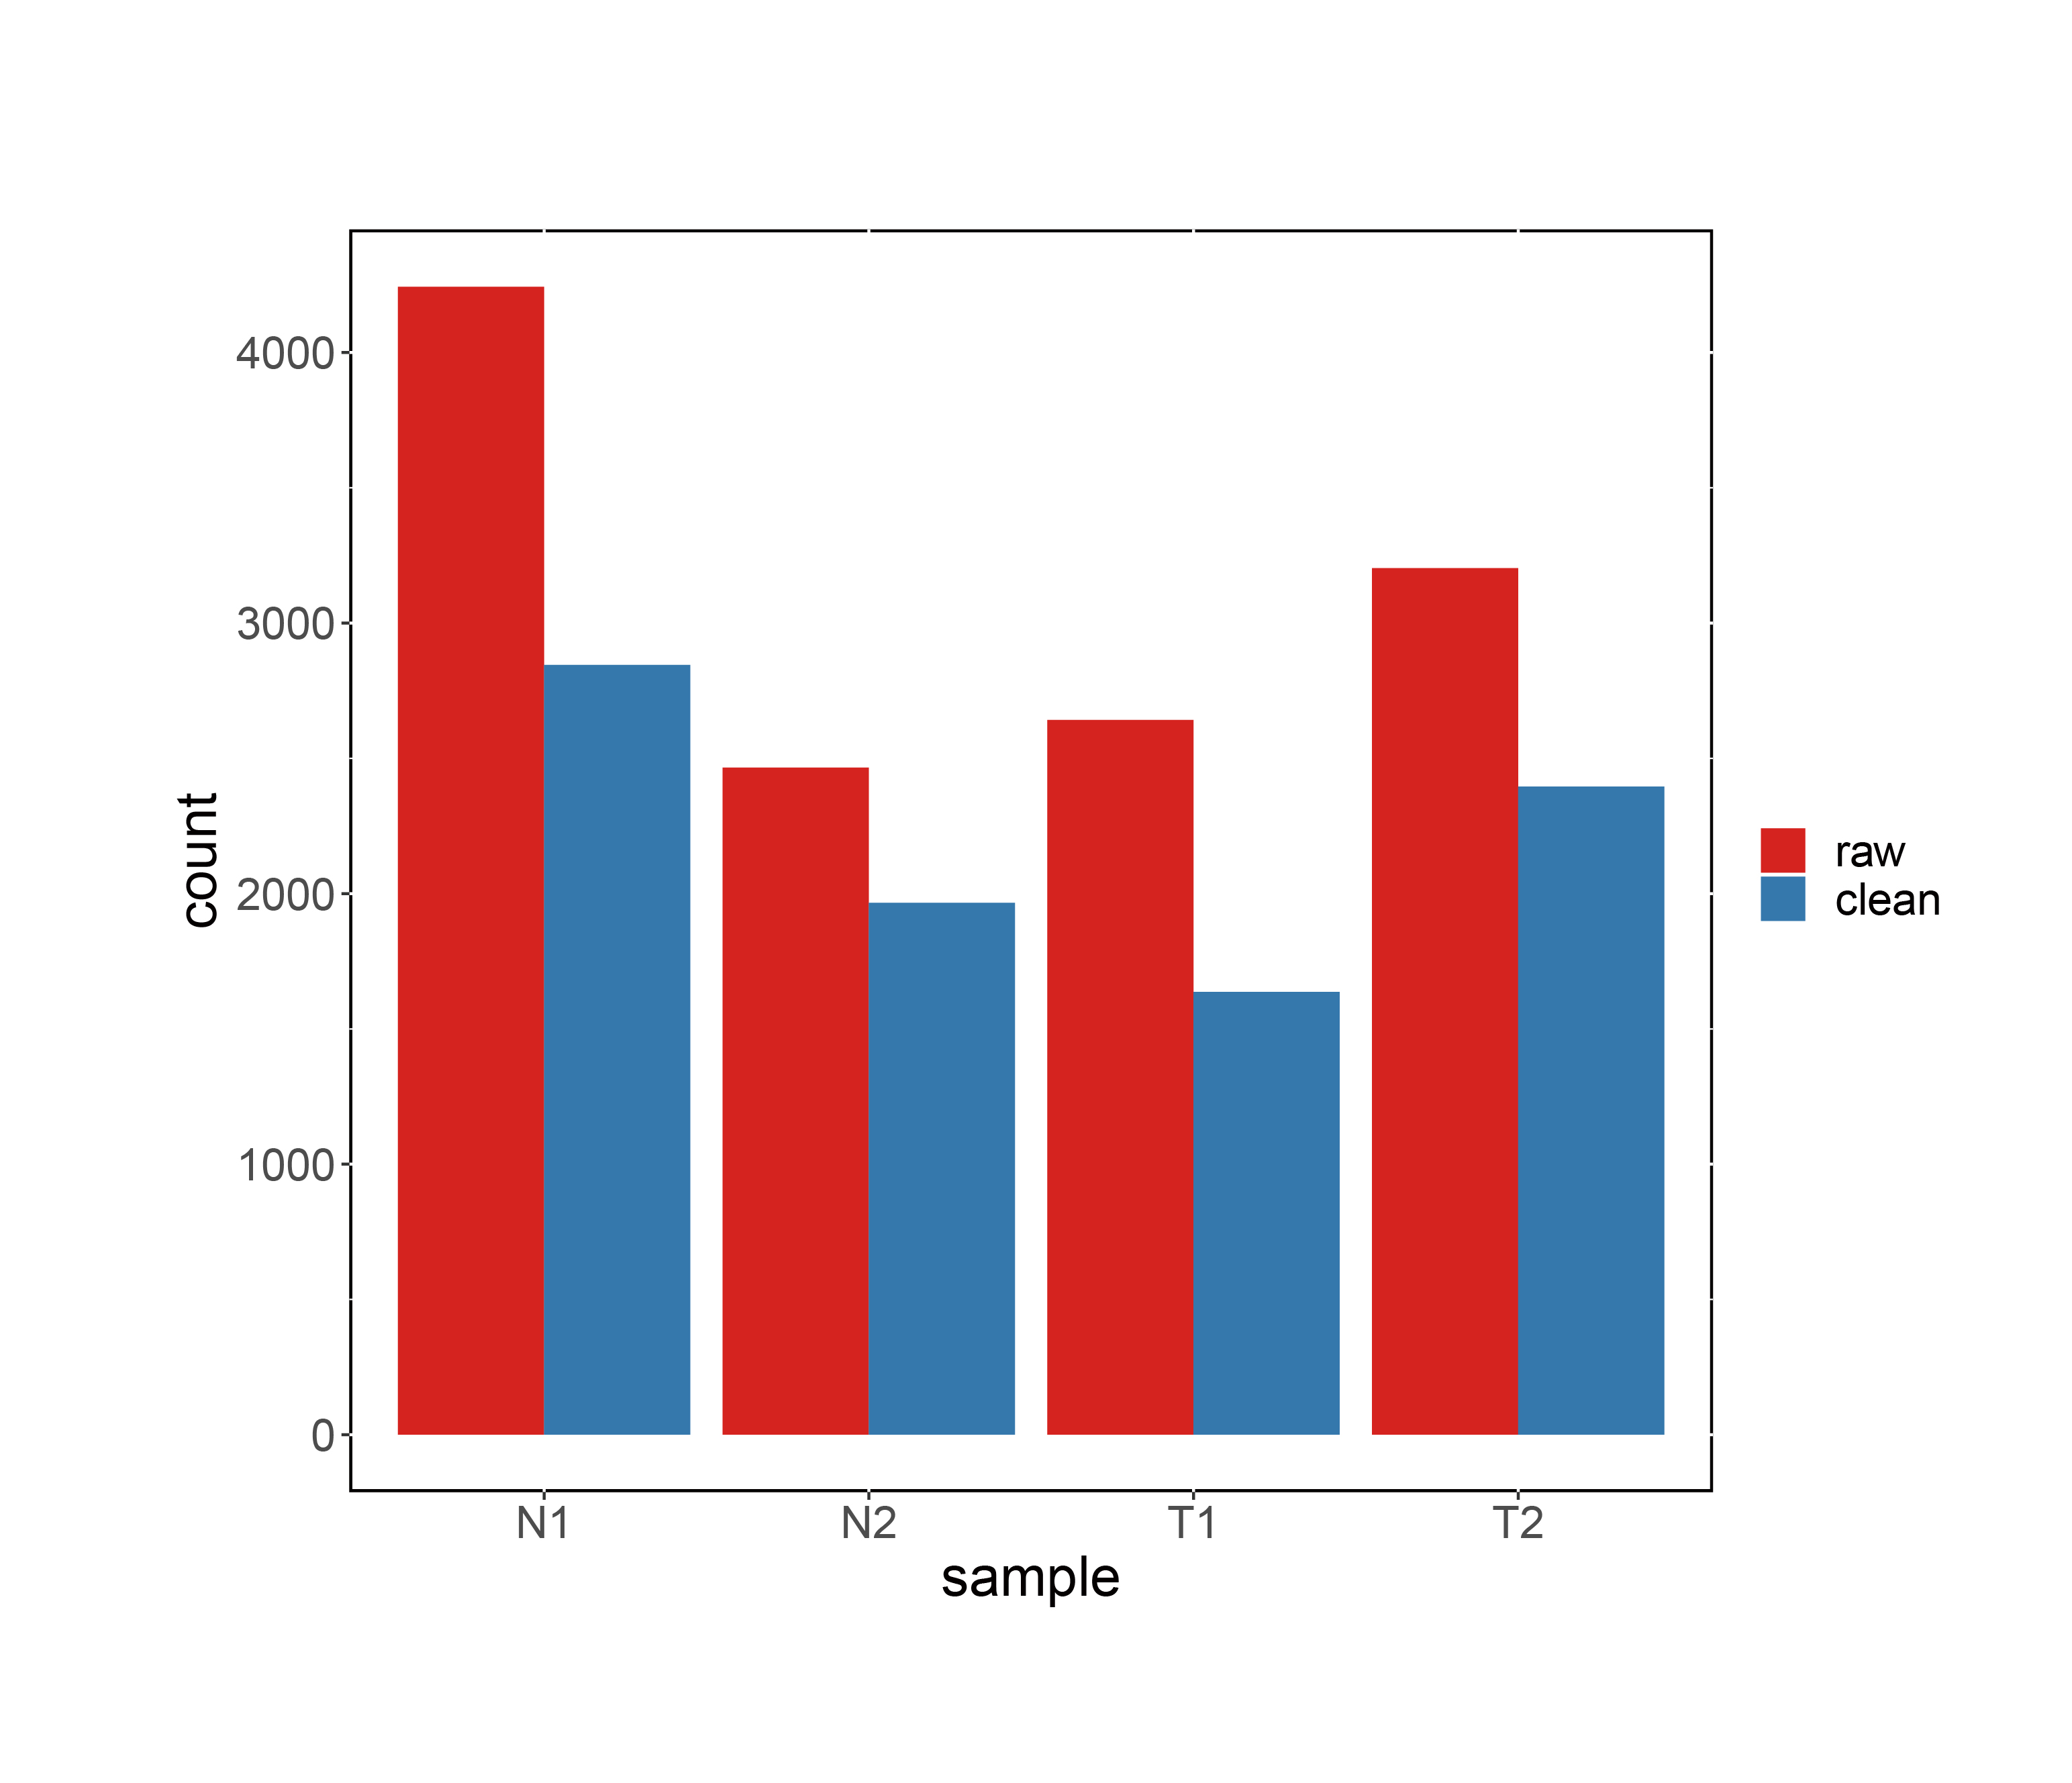


**Supplementary Figure S2. Number of cells per sample before- and after-quality filtration.**


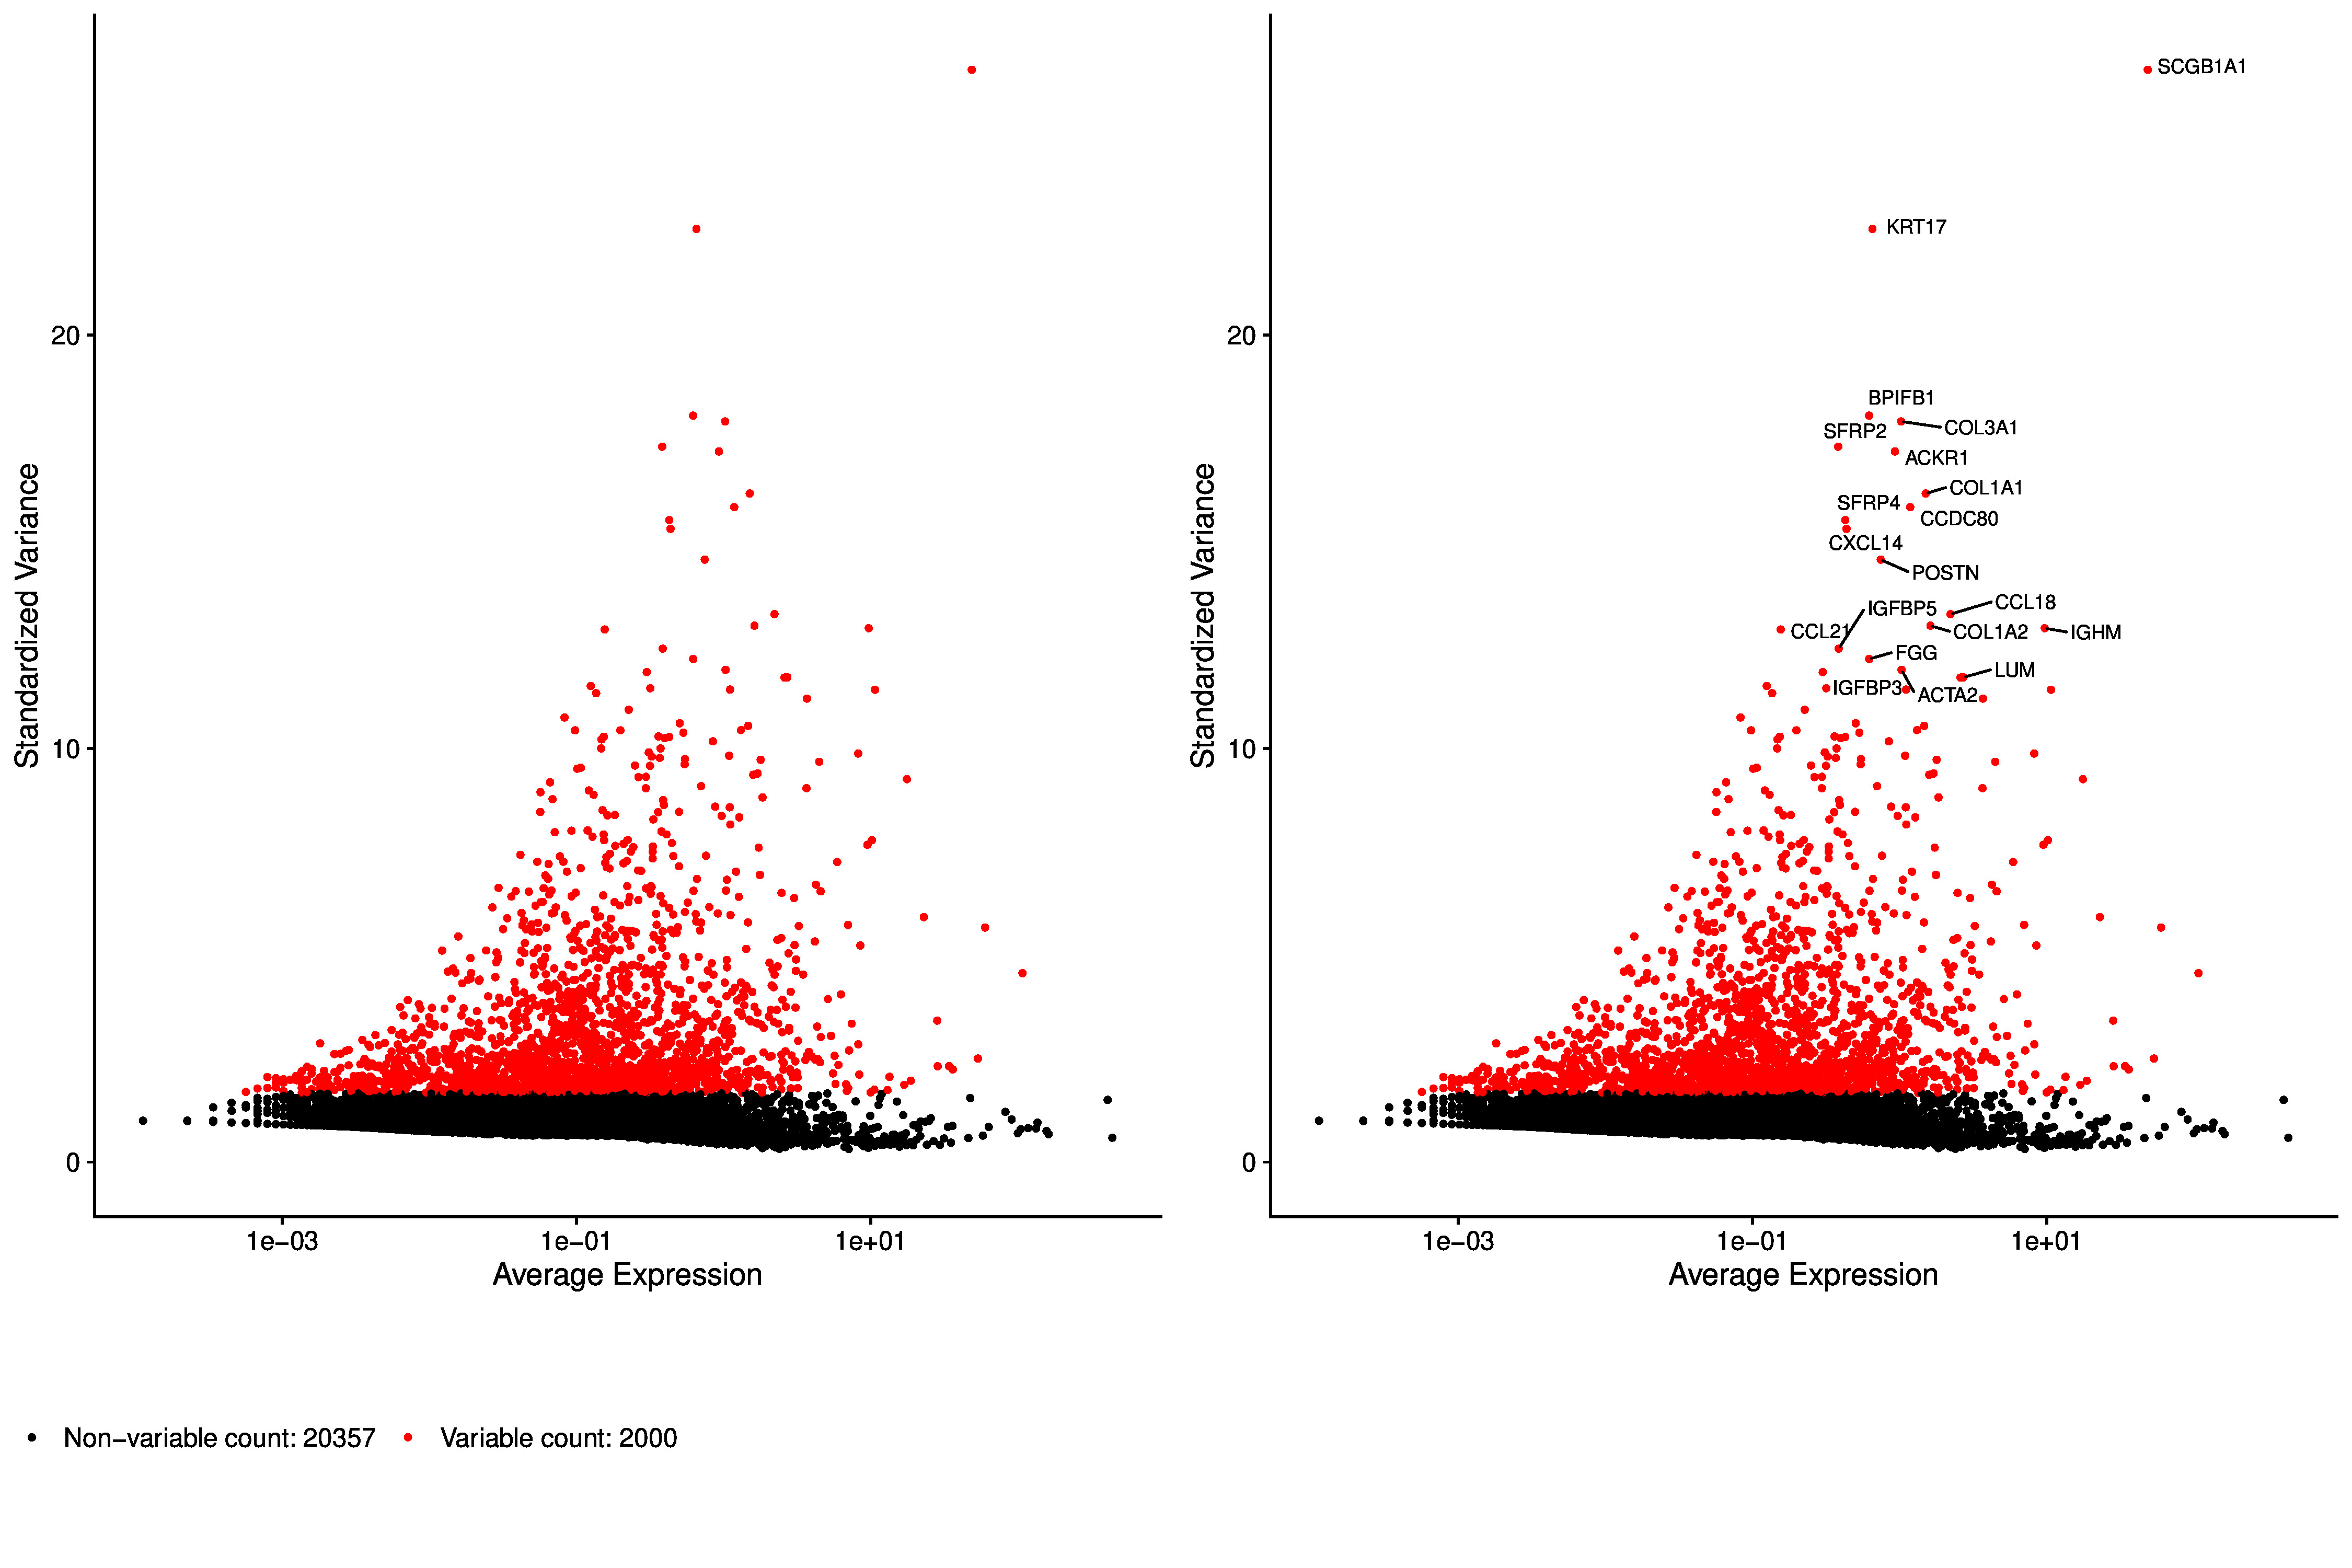


**Supplementary Figure S3. Highly variable gene expressions across cells.**


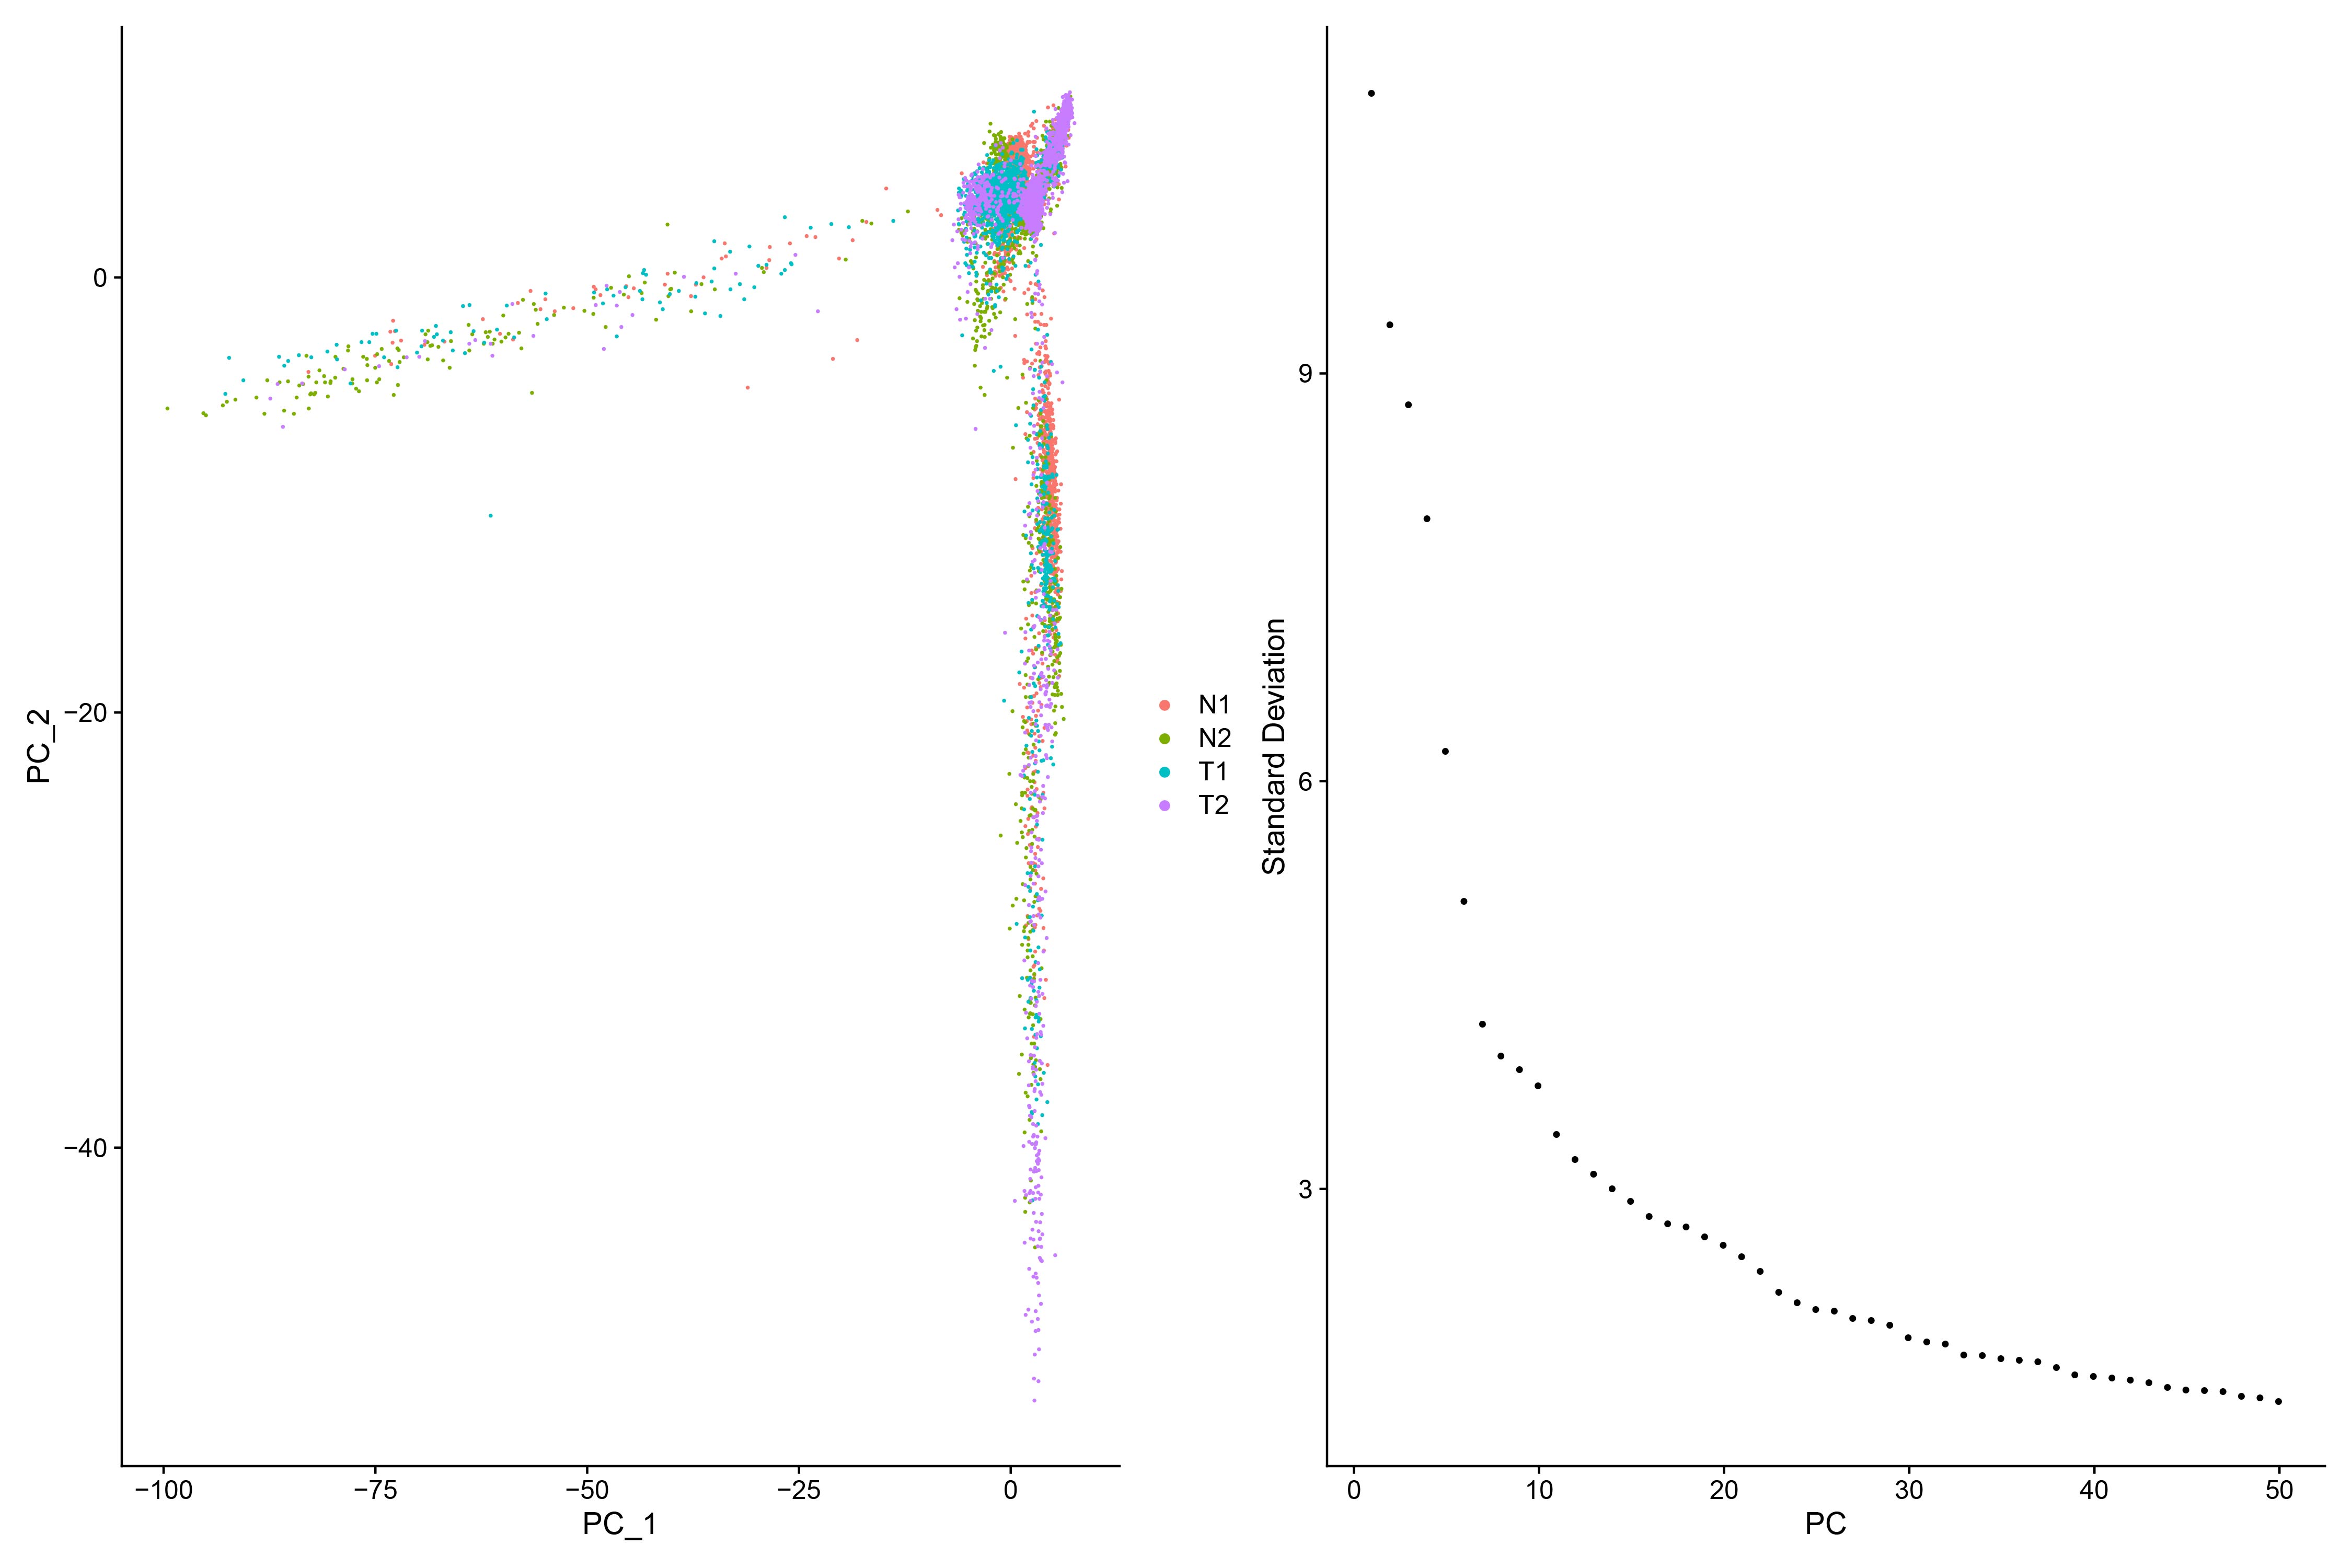


**Supplementary Figure S4. PCA and ranking of the principal components thus obtained according to standard deviations using the ElbowPlot function. PCA, principal component analysis.**
